# Supplementary material for: Simultaneous Differential Detection of H5, H7, H9 and Nine NA Subtypes of Avian Influenza Viruses via a GeXP Assay
Source: MDPI journal article supplement (doi:10.3390/microorganisms12010143), 2024-01-11
Supplement: s1 [file s1]

# Simultaneous Differential Detection of H5, H7, H9 and Nine NA Subtypes of Avian Influenza Viruses via a GeXP Assay

Sisi Luo, Zhixun Xie \*, Meng Li, Dan Li, Minxiu Zhang, Zhihua Ruan, Liji Xie, Sheng Wang, Qing Fan, Yanfang Zhang, Jiaoling Huang and Tingting Zeng

Guangxi Key Laboratory of Veterinary Biotechnology, Key Laboratory of China (Guangxi)-ASEAN Cross-Border Animal Disease Prevention and Control, Ministry of Agriculture and Rural Affairs of China, Guangxi Veterinary Research Institute, Nanning 530001, China; 2004-luosisi@163.com (S.L.); mengli4836@163.com (M.L.); lidan8217@163.com (D.L.); zhminxiu2010@163.com (M.Z.); ruanzhihua2020@163.com (Z.R.); xie3120371@163.com (L.X.); wangsheng1021@126.com (S.W.); fanqing1224@126.com (Q.F.); zhangyanfang409@126.com (Y.Z.); huangjiaoling728@126.com (J.H.); tingtingzeng1986@163.com (T.Z.)

\* Correspondence: xiezixun@126.com

**Table S1. Information and detection result of strains used in the GeXP assay.**

| Num | Pathogens/field samples                   | Source | AIV | H5 | H7 | H9 | N1 | N2 | N3 | N4 | N5 | N6 | N7 | N8 | N9 |
|-----|-------------------------------------------|--------|-----|----|----|----|----|----|----|----|----|----|----|----|----|
| 1   | A/Duck/Guangxi/1/04 (H5N1)AIV cDNA        | GVRI   | +   | +  | -  | -  | +  | -  | -  | -  | -  | -  | -  | -  | -  |
| 2   | A/Chicken/Guangxi/1/04 (H5N1)AIV cDNA     | GVRI   | +   | +  | -  | -  | +  | -  | -  | -  | -  | -  | -  | -  | -  |
| 3   | A/Goose/Guangxi/2/04 (H5N1)AIV cDNA       | GVRI   | +   | +  | -  | -  | +  | -  | -  | -  | -  | -  | -  | -  | -  |
| 4   | A/Chicken/QT35/98 (H5N9) AIV cDNA         | UP     | +   | +  | -  | -  | -  | -  | -  | -  | -  | -  | -  | -  | +  |
| 5   | A/Chicken PA/3979/97 (H7N2) AIV cDNA      | UP     | +   | -  | +  | -  | -  | +  | -  | -  | -  | -  | -  | -  | -  |
| 6   | A/Chicken/NY/273874/03 (H7N2) AIV cDNA    | UC     | +   | -  | +  | -  | -  | +  | -  | -  | -  | -  | -  | -  | -  |
| 7   | A/Duck/42846/07 (H7N7) AIVcDNA            | UP     | +   | -  | +  | -  | -  | -  | -  | -  | -  | -  | +  | -  | -  |
| 8   | A/Chicken/Guangxi/NN1/2017(H7N9) AIV cDNA | GVRI   | +   | -  | +  | -  | -  | -  | -  | -  | -  | -  | -  | -  | +  |
| 9   | A/Chicken/Guangxi/YL1/2017(H7N9) AIV cDNA | GVRI   | +   | -  | +  | -  | -  | -  | -  | -  | -  | -  | -  | -  | +  |
| 10  | A/dove/Guangxi/151B24/2016(H9N2)          | GVRI   | +   | -  | -  | +  | -  | +  | -  | -  | -  | -  | -  | -  | -  |

|    |                                     |       |   |   |   |   |   |   |   |   |   |   |   |   |   |
|----|-------------------------------------|-------|---|---|---|---|---|---|---|---|---|---|---|---|---|
|    | AIV                                 |       |   |   |   |   |   |   |   |   |   |   |   |   |   |
| 11 | A/chicken/Guangxi/178C38/2014(H9N2) | GVRI  | + | - | - | + | - | + | - | - | - | - | - | - | - |
|    | AIV                                 |       |   |   |   |   |   |   |   |   |   |   |   |   |   |
| 12 | A/dove/Guangxi/408P55/2020(H9N2)    | GVRI  | + | - | - | + | - | + | - | - | - | - | - | - | - |
|    | AIV                                 |       |   |   |   |   |   |   |   |   |   |   |   |   |   |
| 13 | A/chicken/Guangxi/449C11/2021(H9N2) | GVRI  | + | - | - | + | - | + | - | - | - | - | - | - | - |
|    | AIV                                 |       |   |   |   |   |   |   |   |   |   |   |   |   |   |
| 14 | A/duck/Guangxi/413D40/2020(H9N2)    | GVRI  | + | - | - | + | - | + | - | - | - | - | - | - | - |
|    | AIV                                 |       |   |   |   |   |   |   |   |   |   |   |   |   |   |
| 15 | A/Duck/HK/77/76 (H2N3) AIV          | UHK   | + | - | - | - | - | - | + | - | - | - | - | - | - |
| 16 | A/Duck/HK/876/80 (H10N3) AIV        | UHK   | + | - | - | - | - | - | + | - | - | - | - | - | - |
| 17 | A/Turkey/Ontario/6118/68 (H8N4) AIV | UHK   | + | - | - | - | - | - | - | + | - | - | - | - | - |
| 18 | A/Duck/HK/862/80 (H12N5) AIV        | UHK   | + | - | - | - | - | - | - | - | + | - | - | - | - |
| 19 | A/dove/Guangxi/288P43/2017(H3N6)    | GVRI  | + | - | - | - | - | - | - | - | - | + | - | - | - |
|    | AIV                                 |       |   |   |   |   |   |   |   |   |   |   |   |   |   |
| 20 | A/duck/Guangxi/LZ038E117/2019(H4N6) | GVRI  | + | - | - | - | - | - | - | - | - | + | - | - | - |
|    | AIV                                 |       |   |   |   |   |   |   |   |   |   |   |   |   |   |
| 21 | A/duck/Guangxi/330D18/2018(H6N6)    | GVRI  | + | - | - | - | - | - | - | - | - | + | - | - | - |
|    | AIV                                 |       |   |   |   |   |   |   |   |   |   |   |   |   |   |
| 22 | A/dove/Guangxi/295D25/2017(H4N8)    | GVRI  | + | - | - | - | - | - | - | - | - | - | - | + | - |
|    | AIV                                 |       |   |   |   |   |   |   |   |   |   |   |   |   |   |
| 23 | A/duck/Guangxi/423D20/2020(H4N8)    | GVRI  | + | - | - | - | - | - | - | - | - | - | - | + | - |
|    | AIV                                 |       |   |   |   |   |   |   |   |   |   |   |   |   |   |
| 24 | A/goose/Guangxi/292G39/2017(H3N8)   | GVRI  | + | - | - | - | - | - | - | - | - | - | - | + | - |
|    | AIV                                 |       |   |   |   |   |   |   |   |   |   |   |   |   |   |
| 25 | A/Duck/PA/2099/12 (H11N9) AIV       | UP    | + | - | - | - | - | - | - | - | - | - | - | - | + |
| 26 | B/Guangxi/1418/15                   | GXCDC | - | - | - | - | - | - | - | - | - | - | - | - | - |
| 27 | B/Guangxi/1470/15                   | GXCDC | - | - | - | - | - | - | - | - | - | - | - | - | - |
| 28 | NDV F48                             | CIVDC | - | - | - | - | - | - | - | - | - | - | - | - | - |
| 29 | IBV M41                             | CIVDC | - | - | - | - | - | - | - | - | - | - | - | - | - |
| 30 | ILTV Beijing strain                 | CIVDC | - | - | - | - | - | - | - | - | - | - | - | - | - |
| 31 | ARV S1133                           | CIVDC | - | - | - | - | - | - | - | - | - | - | - | - | - |
| 32 | FAdV4-GX005                         | GVRI  | - | - | - | - | - | - | - | - | - | - | - | - | - |

GVRI, Guangxi Veterinary Research Institute, China;UHK, University of Hong Kong, China; UP, University of Pennsylvania, USA;UC, University of Connecticut, USA; CIVDC, China Institute of Veterinary Drug Control; GXCDC, Guangxi Provincial Center for Disease Control and Prevention, China.
